# Supplementary material for: Inosine Pretreatment Attenuates LPS-Induced Lung Injury through Regulating the TLR4/MyD88/NF-κB Signaling Pathway In Vivo
Source: MDPI journal article supplement (doi:10.3390/nu14142830), 2022-07-09
Supplement: s1 [file s1]

## Supplementary materials

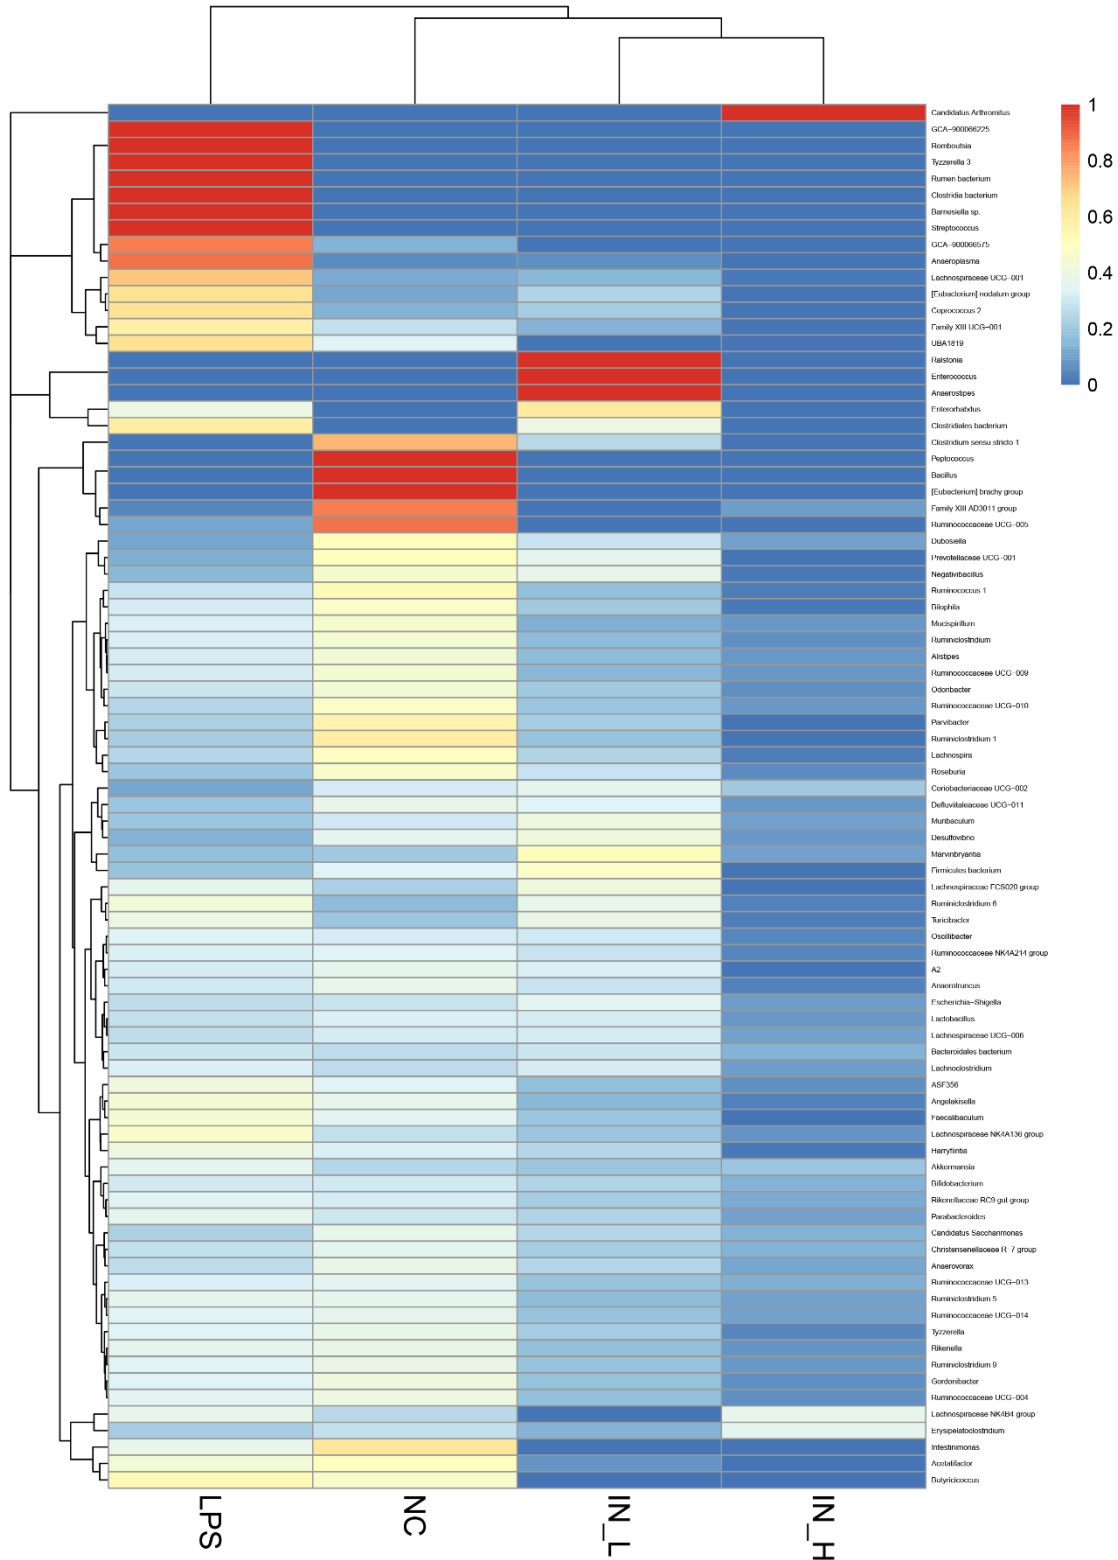

**Figure S1** Heatmap of relative abundance at genus level.

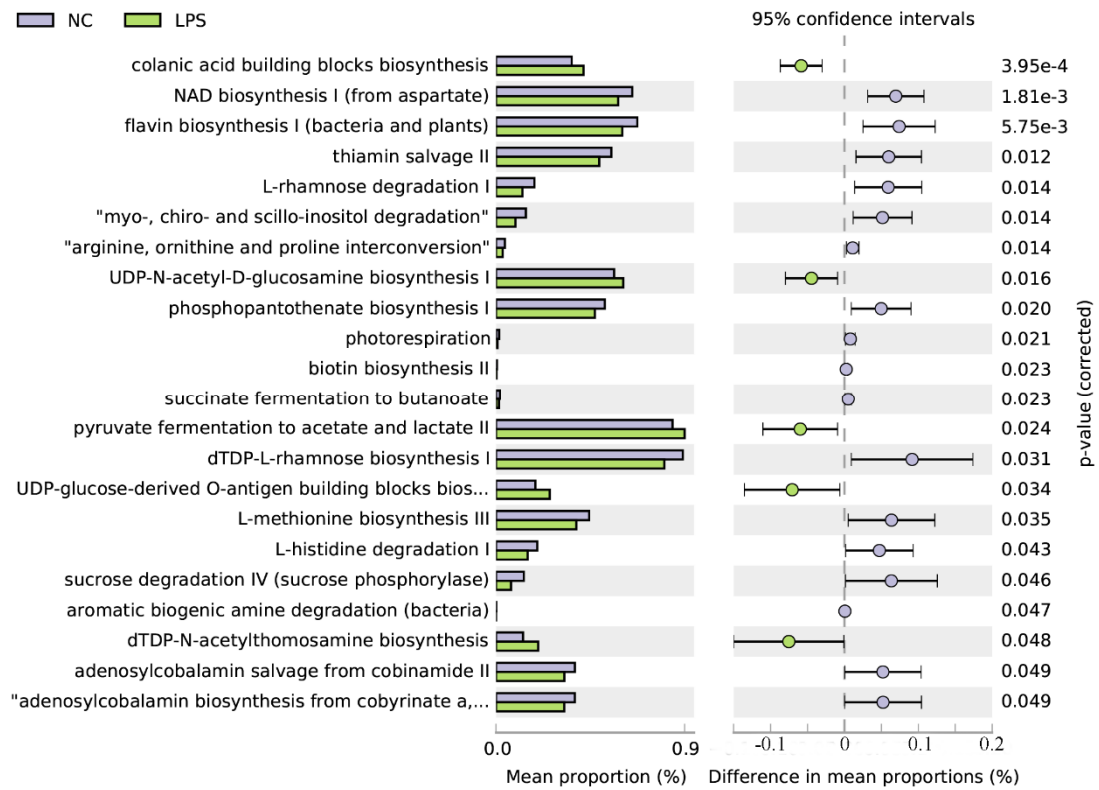

**Figure S2** The remarkably differences of metabolic pathways between the LPS group and the IN-L group

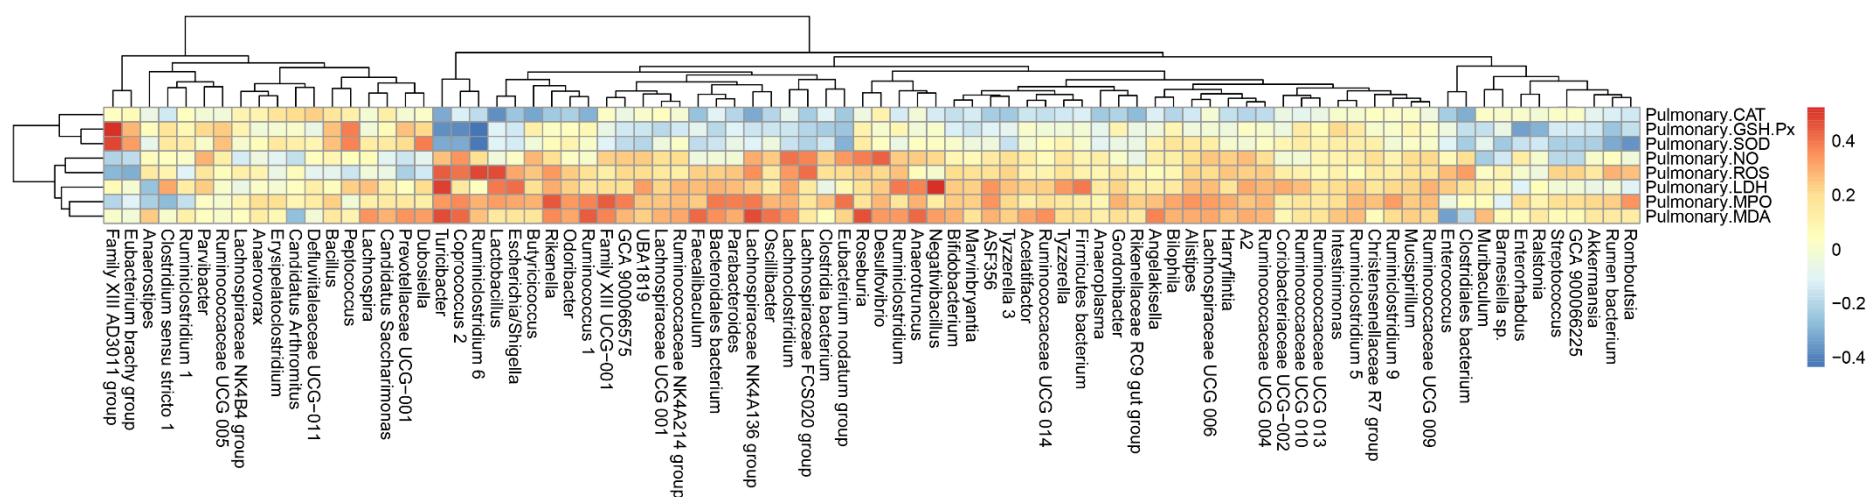

**Figure S3** Heatmap of Spearman's correlations between the key intestinal microbial phylotypes and the parameters related to acute liver injury and inflammation.

**Table S1.** Primer sequences for quantitative real-time PCR of hepatic genes.

| Primers        | Forward Sequences (5'→3') | Reverse Sequences (5'→3') |
|----------------|---------------------------|---------------------------|
| TLR4           | GGCAGCAGGTGGAATTGTAT      | AGGCCCCAGAGTTTTGTTCT      |
| MyD88          | GTGCCGTCGGATGGTAGTG       | GACAGTGATGAACCGCAGGAT     |
| Akt            | TCTACAACCAGGACCACGAGA     | CTCCATGAGGATCAGCTCGAAC    |
| Sirt1          | AGAACCACCAAAGCGGAAA       | TCCCACAGGAGACAGAAACC      |
| Nfr2           | CCTCCGCTGCCATCAGTCAGT     | TCGGCTGGGACTCGTGTTCA      |
| IKB $\alpha$   | ACCAACCAGCCAGAAATCG       | TCACAGGCAAGGTGTAGAGGG     |
| NF- $\kappa$ B | CGCCCCTTATCGACCACC        | CCTTCTCCCAAGAGTCGTCCA     |
| COX2           | GGGAGTCTGGAACATTGTGAA     | GCACGTTGATTGTAGGTGGACTGT  |
| HO-1           | ACATCCAAGCCGAGAATGCTG     | CCAGTGAGGCCCATACCAGA      |
| TNF- $\alpha$  | TCTTCTCATTCTGCTTGTGGC     | ACTTGGTGGTTTGCTACGACG     |
| IL-1 $\beta$   | TCAAATCTCGCAGCAGCACATC    | CGTCACACACCAGCAGGTTATC    |
| IL-6           | CCCCAATTTCCAATGCTCTCC     | CGCACTAGGTTTGCCGAGTA      |
